# Supplementary material for: Genome-wide mapping of genetic determinants influencing DNA methylation and gene expression in human hippocampus
Source: PubMed Central journal article supplement (PMC5688097; doi:10.1038/s41467-017-01818-4), 2017-11-15
Supplement: 41467_2017_1818_MOESM3_ESM.pdf [file 41467_2017_1818_MOESM3_ESM.pdf]

## **Description of Additional Supplementary Files**

File Name: Supplementary Data 1

Description: Hippocampal meQTLs (FDR of 1%)

File Name: Supplementary Data 2

Description: Enrichments / Depletions of cis-meQTL-CpGs in regulatory elements

File Name: Supplementary Data 3

Description: Hippocampal eQTLs (FDR of 1%)

File Name: Supplementary Data 4

Description: Hippocampal eQTLs (FDR of 1%)

File Name: Supplementary Data 5

Description: Hippocampal meQTL SNP consequences

File Name: Supplementary Data 6

Description: Hippocampal eQTL SNP consequences
